# Supplementary material for: Tackling fungal diversity in lichen symbioses: molecular and morphological data recognize new lineages in Chaetothyriales (Eurotiomycetes, Ascomycota)
Source: Springer Nature journal article supplement (doi:10.1007/s11557-023-01901-9), 2023-07-14
Supplement: MOESM1 [file 11557_2023_1901_MOESM1_ESM.pdf]

• SUPPLEMENTARY MATERIAL

Manuscript “Tackling fungal diversity in lichen symbioses: molecular and morphological data recognize new lineages in *Chaetothyriales* (*Eurotiomycetes*, *Ascomycota*)”

Agnese COMETTO<sup>1</sup>, Steven D. LEAVITT<sup>2</sup>, Martin GRUBE<sup>3</sup>, Sybren DE HOOG<sup>4</sup>, Lucia MUGGIA<sup>1\*</sup>

**Table S1** Samples of *Rhizoplaca melanophthalma* and *Tephromela atra* were reported with their thallus ID and the geographic origins; localities are identified by numbers (1–25).

| Lichen host                      | Thallus ID  | Altitude (m a.s.l.) | Substrate         | Geographic origin                                                                                                                                                                                                              | ID populations |
|----------------------------------|-------------|---------------------|-------------------|--------------------------------------------------------------------------------------------------------------------------------------------------------------------------------------------------------------------------------|----------------|
| <i>Rhizoplaca melanophthalma</i> | L2383-L2391 | 1450                | basaltic boulders | Argentina, prov. Mendoza, dep. Malargue, Laguna de Llanquanelo, RP186, 20 km after the crossroad with RN40; S/SW-exposed, scattered in dry pampa vegetation, ca. 35°42'50" S/ 69°27'18" W ( <i>L. Muggia</i> ).                | 1              |
| <i>Rhizoplaca melanophthalma</i> | L2392-L2400 | 2000                | basaltic boulders | Argentina, prov. Mendoza, dep. Malargue, El Sosneado valley, Laguna el Sosneado, S/SW-exposed, dry pampa vegetation, ca. 34°50'43" S /69°54'55" W ( <i>L. Muggia</i> ).                                                        | 2              |
| <i>Rhizoplaca melanophthalma</i> | L2411-L2434 | 2000                | basaltic boulders | Argentina, prov. Mendoza, Tunuyan, Cordillera del los Andes (E side), road 94 towards portillo Argentino, camp "Yareta", 3550 m a.s.l., on acid big boulder, E/S-exposed ( <i>L. Muggia</i> ).                                 | 3              |
| <i>Rhizoplaca melanophthalma</i> | L2436-L2455 | 3550                | acid big boulders | Argentina, prov. Mendoza, Tunuyan, Cordillera del los Andes (E side), road 94 towards portillo Argentino, camp "Yareta", 3550 m a.s.l., on acid big boulder, E/S-exposed ( <i>L. Muggia</i> ).                                 | 4              |
| <i>Rhizoplaca melanophthalma</i> | L2557-L2470 | 3330                | acid rocks        | Argentina, prov. Mendoza, Cordillera de los Andes (E side), Las Cuevas, lowest border of Mt. Tolosa glacier, S-W exposed ( <i>L. Muggia</i> ).                                                                                 | 5              |
| <i>Rhizoplaca melanophthalma</i> | L2471-L2502 | 3643                | acid rock         | Argentina, prov. Mendoza, Potrerillo, Cordillera de los Andes (E side), Cordon del Plata Range, Quebrada del Salto, Refuge I.A.N.I.GLA, E-exposed, ca. 32.92382 S/ 69.36543 W ( <i>L. Muggia</i> ).                            | 6              |
| <i>Rhizoplaca melanophthalma</i> | L2503-L2512 | 4813                | acid rocks        | Argentina, prov. Mendoza, Potrerillo, Cordillera de los Andes (E side), Cordon del Plata Range, Quebrada del Salto, ridge between Cerro El Salto and Cerro Blanco, E-exposed, ca. 32.91376 S/ 69.40169 W ( <i>L. Muggia</i> ). | 7              |
| <i>Rhizoplaca melanophthalma</i> | L2513-L2525 | 5100                |                   | Argentina, prov. Catamarca, dep. Fiambalà, Ojo del el Salado, road towards the Ojo del el Salado ( <i>A.E. Armesto</i> ).                                                                                                      | 8              |

|                                  |              |      |                             |                                                                                                                                                                                                                     |    |
|----------------------------------|--------------|------|-----------------------------|---------------------------------------------------------------------------------------------------------------------------------------------------------------------------------------------------------------------|----|
| <i>Rhizoplaca melanophthalma</i> | L2526-L2544  | 3300 | on acid rock                | Chile, prov. Santiago de Chile, Valle (valley) del Yeso, Cordillera del Los Andes (W side), on the path going from the Bano del Plomo to the Laguna de los Patos, S-exposed ( <i>J. Orlando &amp; D.Leiva</i> ).    | 9  |
| <i>Tephromela atra</i>           | L2545-L2565  | 600  |                             | Chile, Region de Aysén del General Carlos Ibanez del Campo, prov. Capitan Prat, dep. Cochran, Tamango National Reserve ( <i>J. Orlando &amp; D.Leiva</i> ).                                                         | 10 |
| <i>Rhizoplaca melanophthalma</i> | L2566-L2568  |      |                             |                                                                                                                                                                                                                     | 11 |
|                                  |              | 2080 | siliceous-granitic boulders | Europa, Spain, prov. Madrid, Miraflores del la Sierra, Puerto de la Morquera, summit of Pico Najarra, ca. 40°48'55" N/3°49'34" W ( <i>L. Muggia &amp; S. Perez-Ortega</i> ).                                        |    |
| <i>Tephromela atra</i>           | L2569-L2582  |      |                             |                                                                                                                                                                                                                     | 12 |
| <i>Tephromela atra</i>           | L2583-L2584  |      |                             |                                                                                                                                                                                                                     | 13 |
|                                  |              | 1900 | siliceous-granitic boulders | Europe, Spain, prov. Madrid, Miraflores del la Sierra, Puerto de la Morquera, towards Pico Najarra, about 150 m above Puerto de la Morquera, ca. 40°49'22" N/3°49'49" W ( <i>L. Muggia &amp; S. Perez-Ortega</i> ). |    |
| <i>Rhizoplaca melanophthalma</i> | L2585-L2594  |      |                             |                                                                                                                                                                                                                     | 14 |
| <i>Tephromela atra</i>           | L2595- L2603 | 545  | dolorite boulders           | Australia, Tasmania, three Thumbs, summit area, 42°36'S/147°52'E, Grid; 570752828/ Grid. Sq.: 5728; in dry sclerophyll forest ( <i>G. Kantvilas</i> ).                                                              | 15 |
| <i>Rhizoplaca melanophthalma</i> | L2635-L2667  | 1700 | Quartzite                   | USA , Utah, Utah Co., Rock Canyon, ca. 2 km from trailhead, on exposed quartzite outcrop on north-facing side of canyon; 40.2649, -111.6179 ( <i>Leavitt 19-303</i> ).                                              | 16 |
| <i>Rhizoplaca melanophthalma</i> | L2668-L2685  | 1665 | sandstone boulders          | USA, Utah, Emery County, vic. of Horse Canyon Rest Area along US Highway 6, on sandstone in Pinyon/Juiper woodland: 39.4123, -110.4320 ( <i>Leavitt 19-235</i> ).                                                   | 17 |
| <i>Rhizoplaca melanophthalma</i> | L2686-L2703  | 2020 | Wasatch Formation           | USA, Utah, Rich Co., southeast of Bear Lake along Highway 30 and west of Sage Creek Junction, on rock in sage-steppe habitat; 41.7905, -111.2129 ( <i>Leavitt 19-157</i> ).                                         | 18 |
| <i>Rhizoplaca melanophthalma</i> | L2704-L2721  | 2490 | sandstone boulder           | USA, Utah, Duchesne Co.; Ashley National Forest; South Unit, on Nutter's Ridge, on sandstone outcrop north-east of exlosure site ( <i>SD Leavitt</i> ).                                                             | 19 |
| <i>Rhizoplaca melanophthalma</i> | L2722-L2731  | 1845 | basalt/volcanic rocks       | USA, Idaho, Owyhee Co. Along Mud Flat Rd, 27.7 miles from Highway 78. 42.704228-166.3832 ( <i>Leavitt 19.233</i> )                                                                                                  | 20 |

|                                  |             |      |                       |                                                                                                                                                                                                                     |    |
|----------------------------------|-------------|------|-----------------------|---------------------------------------------------------------------------------------------------------------------------------------------------------------------------------------------------------------------|----|
| <i>Rhizoplaca melanophthalma</i> | L2732-L2752 | 2210 | silicic ash flow tuff | USA, Nevada, Nye Co., Humboldt-Toiyabe National Forest, Table Mountain Wilderness Area, near boundary of Table Mountain Wilderness Area, along USFS Road No. 4409b, at Mosquito Creek Trailhead.; 38.80717 -116.682 | 21 |
| <i>Tephromela atra</i>           | L2753-L2763 | 555  |                       | Mauritius; Port Louis and Moka Districts; along the trail from Moka to Le pouce, 20°12'04" S (± 100 m), 57°31'26" E (± 100 m).                                                                                      | 22 |
| <i>Rhizoplaca melanophthalma</i> | L2786-L2799 | 2700 | acidic rocks          | Argentina, prov. Mendoza, road RP52, near to Paramillo, ca. 30 m above the road, ca. 32°30'13" S/ 69°03'18" W ( <i>L. Muggia</i> ).                                                                                 | 23 |
| <i>Rhizoplaca melanophthalma</i> | L2800-L2821 | 4300 | acidic rocks          | Argentina, prov. Mendoza, dep. Tunuyan, valley towards Portillo Argentino (RN86), summit of Cerro Punta Negra ( <i>L. Muggia</i> ).                                                                                 | 24 |
| <i>Rhizoplaca melanophthalma</i> | L2822-L2844 | 3650 | basic granitic rocks  | Argentina, prov. Mendoza, dep. Tunuyan, valley towards Portillo Argentino (RN86), ca. 100 height m above the bridge/bifurcation with the road towards Manantiales Valley ( <i>L. Muggia</i> ).                      | 25 |

**Table S2** List of taxa included in the phylogenetic analysis of *Eurotiomycetes* (*Chaetothyriales*) and their NCBI accessions.

| Species                           | ID                 | ITS       | LSU       |
|-----------------------------------|--------------------|-----------|-----------|
| <i>Aculeata aquatica</i>          | MFLUCC 11-0529     | MG922571  | MG922575  |
| <i>Anthracinomyces petraeus</i>   | CGMCC 37315        | KP174843  | KP174924  |
| <i>Aphanophora eugeniae</i>       | CBS 124105 (T)     | FJ839617  | NG056965  |
| <i>Arthrocladium caudatum</i>     | CBS 457.67 (T)     | MH859032  | NG_057084 |
| <i>Arthrocladium fulminans</i>    | CBS 136243 (T)     | KT337439  | NG057088  |
| <i>Arthrocladium tropicale</i>    | CBS 134926 (T)     | KX822543  | p         |
| <i>Bagliettoa baldensis</i>       | RCH48178           | KM371431  | -         |
| <i>Bagliettoa calciseda</i>       | WRB46575           | KM371440  | -         |
| <i>Bradymyces alpinus</i>         | CCFEE 5493 (T)     | HG793052  | GU250396  |
| <i>Camptophora hylomeconis</i>    | CBS 113311 (T)     | EU035415  | EU035415  |
| <i>Capronia acutisetata</i>       | CBS 618.96 (T)     | NR_154744 | NG058859  |
| <i>Capronia kleinmondensis</i>    | CBS 122671 (T)     | MH863226  | EU552107  |
| <i>Capronia mansonii</i>          | CBS 101.67 (T)     | AF050247  | AY004338  |
| <i>Capronia</i> sp.               | 97003a             | EU139134  | -         |
| <i>Capronia</i> sp.               | 97003b             | EU139135  | -         |
| <i>Ceramothyrium aquaticum</i>    | VTCCF-1210 (T)     | LC360299  | LC360296  |
| <i>Ceramothyrium carniolicum</i>  | CBS 175.95         | KC978733  | KC455251  |
| <i>Ceramothyrium podocarpi</i>    | CPC 19826 (T)      | KC005773  | NG042751  |
| <i>Ceramothyrium thailandicum</i> | MFLUCC 10-0008 (T) | HQ895838  | NG058817  |
| <i>Chaetothyriales</i> sp.        | A872               | MT193584  | KT270601  |
| <i>Chaetothyriales</i> sp.        | A941               | -         | KT270646  |
| <i>Chaetothyriales</i> sp.        | A957               | MT193583  | KT270659  |
| <i>Chaetothyriales</i> sp.        | A983               | -         | KT270674  |
| <i>Chaetothyriales</i> sp.        | CBS 129049         | KX822531  | KX822531  |
| <i>Chaetothyriales</i> sp.        | CBS 132039         | KX822517  | KX822342  |
| <i>Chaetothyriales</i> sp.        | ES37               | MN218810  | -         |
| <i>Chaetothyriales</i> sp.        | KhNk32             | KX822512  | KX822337  |
| <i>Chaetothyriales</i> sp.        | L1993              | KT263084  | KT263084  |
| <i>Chaetothyriales</i> sp.        | T171               | KF614875  | KF614875  |
| <i>Chaetothyriales</i> sp.        | L1994              | KT263085  | KT263085  |
| <i>Chaetothyriales</i> sp.        | 16708              | JQ342183  | JQ342185  |
| <i>Chaetothyriales</i> sp.        | A543               | -         | KT263148  |
| <i>Chaetothyriales</i> sp.        | A925               | -         | KT270636  |
| <i>Chaetothyriales</i> sp.        | A955               | -         | KT270657  |
| <i>Chaetothyriales</i> sp.        | A968               | -         | KT270664  |
| <i>Chaetothyriales</i> sp.        | CBS 128959         | KX822542  | KX822542  |
| <i>Chaetothyriales</i> sp.        | CBS 128963         | KX822501  | KX822328  |
| <i>Chaetothyriales</i> sp.        | CBS 128973         | KX822547  | KX822354  |
| <i>Chaetothyriales</i> sp.        | CBS 134920         | KX822495  | KX822324  |
| <i>Chaetothyriales</i> sp.        | Cecr4              | KX822476  | KX822476  |
| <i>Chaetothyriales</i> sp.        | L1992              | KT263083  | KT263083  |
| <i>Chaetothyriales</i> sp.        | Pet5a              | KX822546  | KX822353  |
| <i>Chaetothyriales</i> sp.        | T13                | KF614778  | KF614778  |
| <i>Chaetothyriales</i> sp.        | A896               | -         | KT270620  |
| <i>Chaetothyriales</i> sp.        | CBS 128948         | KX822492  | KX822492  |
| <i>Chaetothyriales</i> sp.        | T333               | KF614873  | KF614873  |
| <i>Chaetothyriales</i> sp.        | A933               | MT193581  | KT270641  |
| <i>Chaetothyriales</i> sp.        | A568               | -         | KT263157  |
| <i>Chaetothyriales</i> sp.        | A956               | -         | KT270658  |
| <i>Chaetothyriales</i> sp.        | A581               | MT193582  | KT263163  |
| <i>Chaetothyriales</i> sp.        | 131b               | KM056296  | -         |
| <i>Chaetothyriales</i> sp.        | 97001a             | EU139141  | -         |
| <i>Chaetothyriales</i> sp.        | 01001a             | EU139137  | -         |

|                                      |                |            |           |
|--------------------------------------|----------------|------------|-----------|
| <i>Chaetothyriales</i> sp.           | L204           | FJ265765   | -         |
| <i>Chaetothyriales</i> sp.           | L474           | FJ265772   | -         |
| <i>Chaetothyriales</i> sp.           | Sh25           | FJ265771   | -         |
| <i>Chaetothyriales</i> sp.           | SH9            | FJ265770   | -         |
| <i>Cladophialophora boppii</i>       | CBS 126.86 (T) | MH861932   | NG058762  |
| <i>Cladophialophora carrionii</i>    | CBS_160.54     | KF928453   | LC192080  |
| <i>Cladophialophora devriesii</i>    | CBS 147.84 (T) | EU103985   | KC809989  |
| <i>Cladophialophora humicola</i>     | CBS 117536 (T) | EU035408   | NG058850  |
| <i>Cladophialophora lanosa</i>       | KNU 16032 (T)  | LC387460   | LC387461  |
| <i>Cladophialophora matsushimae</i>  | MFC1-P384 (T)  | FN549916   | FN400758  |
| <i>Cladophialophora minourae</i>     | CBS 556.83 (T) | AY251087   | NG058763  |
| <i>Cladophialophora mycetomatis</i>  | CBS 122637 (T) | FJ385276   | NG058960  |
| <i>Cladophialophora parmeliae</i>    | CBS 129337     | JQ342180.2 | JQ342182  |
| <i>Cladophialophora potulentorum</i> | CBS 114772     | EU035410   | EU035410  |
| <i>Cladophialophora proteae</i>      | CBS 111667 (T) | EU035411   | EU035411  |
| <i>Cladophialophora psammophila</i>  | CBS 110553 (T) | AY857517   | NG058955  |
| <i>Cladophialophora samoensis</i>    | CBS 259.83 (T) | MH861581   | NG058854  |
| <i>Cladophialophora</i> sp.          | 131            | KM056295   | -         |
| <i>Cladophialophora</i> sp.          | A670B          | KP889119   | -         |
| <i>Cladophialophora</i> sp.          | L359           | FJ265750   | -         |
| <i>Cladophialophora</i> sp.          | S5             | FJ265746   | -         |
| <i>Cladophialophora</i> sp.          | Sh20           | FJ265753   | -         |
| <i>Cladophialophora</i> sp.          | SH8            | FJ265747   | -         |
| <i>Cladophialophora</i> sp.          | SYPF 8340      | -          | MF588879  |
| <i>Cladophialophora</i> sp.          | A1044          | -          | KT263082  |
| <i>Cladophialophora</i> sp.          | A1069          | -          | MF071385  |
| <i>Cladophialophora subtilis</i>     | CBS 122642 (T) | FJ385273   | NG058961  |
| <i>Cladophialophora tumbae</i>       | JCM 28746 (T)  | LC192125   | LC192090  |
| <i>Cladophialophora yegresii</i>     | CBS 114405 (T) | EU137322   | NG058855  |
| <i>Cyphellophora eucalypti</i>       | CBS 124764 (T) | KC455238   | GQ303305  |
| <i>Cyphellophora laciniata</i>       | CBS 190.61 (T) | EU035416   | KF928547  |
| <i>Cyphellophora olivacea</i>        | CBS 122.74 (T) | KC455247   | KC455260  |
| <i>Cyphellophora pluriseptata</i>    | CBS 286.85 (T) | MH861881   | KC455255  |
| <i>Cyphellophora sessilis</i>        | CBS 243.85 (T) | AY857542   | EU514700  |
| <i>Endocarpon adscendens</i>         | CG671          | KF959777   | EF643751  |
| <i>Epibryon bryophilum</i>           | CBS 126278     | MH863955   | MH875414  |
| <i>Epibryon turfosorum</i>           | CBS 126587     | MH864165   | MH875627  |
| <i>Exophiala alcalophila</i>         | CBS 520.82 (T) | MH861524   | NG059189  |
| <i>Exophiala bonariae</i>            | CCFEE 5792 (T) | JX681046   | KR781083  |
| <i>Exophiala castellanii</i>         | CBS 158.58 (T) | MH857734   | KF928522  |
| <i>Exophiala dermatitidis</i>        | CBS 207.35 (T) | MH855649   | NG059225  |
| <i>Exophiala eucalypticola</i>       | CBS 143412 (T) | MH107891   | NG_063955 |
| <i>Exophiala italica</i>             | MFLUCC 16-0245 | KY496744   | KY496723  |
| <i>Exophiala mesophila</i>           | CBS 402.95     | MH862536   | KX712349  |
| <i>Exophiala nigra</i>               | CBS 535.94 (T) | KY115191   | NG059253  |
| <i>Exophiala pisciphila</i>          | CBS 537.73 (T) | DQ826739   | MH872483  |
| <i>Exophiala polymorpha</i>          | CBS 138920 (T) | KP070763   | NG059237  |
| <i>Exophiala salmonis</i>            | CBS 157.67 (T) | JF747137   | AY213702  |
| <i>Exophiala</i> sp.                 | SYPF 8334      | MF588877   | MF588894  |
| <i>Exophiala spinifera</i>           | D22I           | MH010942   | MH012097  |
| <i>Fonsecaea minima</i>              | CBS 125757 (T) | MH863743   | KF928520  |
| <i>Fonsecaea pedrosoi</i>            | CBS 271.37 (T) | AB114127   |           |
| <i>Fumagopsis stellae</i>            | CBS 145078 (T) | NR_161138  | NG_066293 |
| Fungal sp.                           | CCFEE 5323     | FJ392866   | GU250378  |
| Fungal sp.                           | CCFEE 5324     | FJ392867   | GU250379  |
| <i>Herpotrichiellaceae</i> sp.       | MUT 5408       | KR014371   | KP671741  |
| <i>Knufia marmoricola</i>            | CCFEE 6201     | KP791790   | KR781077  |
| <i>Knufia mediterranea</i>           | CCFEE 6205     | KP791794   | KR781081  |

|                                          |                                  |           |           |
|------------------------------------------|----------------------------------|-----------|-----------|
| <i>Knufia peltigerae</i>                 | CGMCC 37283                      | KP174864  | KP174935  |
| <i>Knufia petricola</i>                  | CBS 726.95 (T)                   | MH862556  | NG042775  |
| <i>Knufia separata</i>                   | CGMCC:37294                      | KP174855  | -         |
| <i>Knufia separata</i>                   | CGMCC:37337                      | KP174856  | NG_075199 |
| <i>Knufia tsunedae</i>                   | FMR 10621 (T)                    | NR_132842 | HG003672  |
| <i>Lichenodiplis lecanorae</i>           | L-Ertz19202                      | -         | KT285909  |
| <i>Lithohypha aloicola</i>               | CPC 35996(T)                     | NR_166313 | MN567611  |
| <i>Melanina gundecimermaniae</i>         | A1111                            | -         | MF071401  |
| <i>Melanoctona tectonae</i>              | MFLUCC 12-0389<br>(T)            | KX258778  | KX258779  |
| <i>Metulocladosporiella musicola</i>     | CBS 110960 (T)<br>MFLUCC 15-0237 | MH862870  | DQ008153  |
| <i>Minimelanolocus asiaticus</i>         | (T)                              | NR_154179 | KR215610  |
| <i>Minimelanolocus rousselianus</i>      | CBS 126086                       | MH863784  | MH875246  |
| <i>Neophaeococcomyces aloes</i>          | CBS 136431                       | NR_132069 | NG_070373 |
| <i>Neophaeococcomyces aloes</i>          | FJII_L3_CM_P2                    | MT704886. | -         |
| <i>Paracladophialophora cyperacearum</i> | CPC 33046 (T)                    | NR_160625 | MH327844  |
| <i>Paracladophialophora carceris</i>     | CPC 27596 (T)                    | NR_154360 | KY173488  |
| <i>Phaeoannellomyces elegans</i>         | CBS 101597                       | NR_155687 | KY115194  |
| <i>Phaeosaccardinula dendrocalami</i>    | IFRDCC 2649 (T)                  | NR_137820 | NG060116  |
| <i>Phialophora attae</i>                 | CBS 132767                       | KF928464  | KF928528  |
| <i>Phialophora verrucosa</i>             | CBS 286.47                       | KF928455  | KF928519  |
| <i>Placopyrenium bucekii</i>             | AFTOL-ID 2238                    | EU010246  | EF643768  |
| <i>Pleostigma alpinum</i>                | A1125                            | -         | MF071409  |
| <i>Pleostigma alpinum</i>                | A584                             | -         | KT263164  |
| <i>Pleostigma alpinum</i>                | A879                             | -         | KT270608  |
| <i>Pleostigma frigidum</i>               | A989                             | -         | KT270678  |
| <i>Pleostigma frigidum</i>               | A980                             | -         | KT270672  |
| <i>Pleostigma lichenophilum</i>          | A926                             | -         | KT270637  |
| <i>Pleostigma lichenophilum</i>          | A952                             | -         | KT270655  |
| <i>Pleostigma sp.</i>                    | A511                             | -         | KT263126  |
| <i>Pleostigma sp.</i>                    | A570                             | -         | KT263158  |
| <i>Pleostigma sp.</i>                    | A865                             | -         | KT270594  |
| <i>Pleostigma sp.</i>                    | A866                             | -         | KT270595  |
| <i>Pleostigma sp.</i>                    | A903                             | -         | KT270624  |
| <i>Polyblastia abscondita</i>            | SS068                            | EU553507  | EU598718  |
| <i>Pyrenula aspistea</i>                 | RAMK17277                        | KT820129  | KT808563  |
| <i>Pyrenula cruenta</i>                  | CBS 132373                       | KC592269  | -         |
| <i>Pyrenula macrospora</i>               | CG1520a                          | JQ927455  | JQ927473  |
| <i>Pyrenula reebia</i>                   | AFTOL-ID                         | DQ782845  | -         |
| <i>Pyrgillus javanicus</i>               | AFTOL-ID 342                     | DQ826741  | DQ823103  |
| <i>Rhinocladiella aquaspersa</i>         | CBS 122635                       | GU017732  | KX822357  |
| <i>Rhinocladiella atrovirens</i>         | CBS 264.49 (T)                   | MH856518  | EU041869  |
| <i>Rhinocladiella fasciculata</i>        | CBS 132.86 (T)                   | NR_145356 | NG_057784 |
| <i>Rhinocladiella quercus</i>            | CPC 26621 (T)                    | KX306769  | NG059698  |
| <i>Rhinocladiella similis</i>            | PW3041                           | LC158611  | LC158635  |
| <i>Rhinocladiella sp.</i>                | L214                             | FJ265762  | -         |
| <i>Sclerococcum striatum</i>             | PDD:119538                       | OL709434  | -         |
| <i>Sclerococcum martynii</i>             | F-1570b                          | MZ221616  | MZ221623  |
| <i>Sclerococcum simplex</i>              | MFLU 21-0117                     | -         | MZ655912  |
| <i>Sclerococcum tardum</i>               | PDD:91756                        | OL709435  | -         |
| <i>Sorocybe oblongispora</i>             | DAOMC 251618                     | NR_166300 | NG_067905 |
| <i>Sorocybe oblongispora</i>             | NB-829                           | MN114116  | MN114118  |
| <i>Staurothele areolata</i>              | CG378                            | JQ927448  | EF643772  |
| <i>Strelitziana albiziae</i>             | CBS 126497 (T)                   | MH864122  | HQ599585  |
| <i>Strelitziana eucalypti</i>            | CBS 128214                       | HQ599596  | HQ599597  |
| <i>Thysanorea aquatica</i>               | MFLCC 15-0966<br>MFLUCC 10-0078  | MG922572  | MG922576  |
| <i>Trichomerium foliicola</i>            | (T)                              | JX313655  | JX313661  |

|                                   |                |          |          |
|-----------------------------------|----------------|----------|----------|
| Uncultured <i>Chaetothyriales</i> | NMF-OTU-121    | MG707593 | -        |
| Uncultured <i>Chaetothyriales</i> | FM034.2        | JF691080 | -        |
| Uncultured <i>Chaetothyriales</i> | A037C          | KP889139 | -        |
| Uncultured <i>Chaetothyriales</i> | A459B          | KP889117 | -        |
| <i>Veronea japonica</i>           | CBS 776.83 (T) | MH861692 | NG057789 |
| <i>Verrucariales</i> sp.          | A1143          | -        | MF071419 |
| <i>Verrucariales</i> sp.          | A993           | -        | KT263073 |
| <i>Vonarxia vagans</i>            | CBS 123533 (T) | FJ839636 | NG057821 |

**Table S3** List of taxa included in the phylogenetic analysis of *Herpotrichiellaceae* (*Chaetothyriales*) and their NCBI accessions.

| Species                                       | ID             | ITS       | LSU      |
|-----------------------------------------------|----------------|-----------|----------|
| <i>Aculeata aquatica</i>                      | MFLUCC 11-0529 | MG922571  | MG922575 |
| <i>Capronia acutiseta</i>                     | CBS 618.96 (T) | NR_154744 | NG058859 |
| <i>Capronia kleinmondensis</i>                | CBS 122671 (T) | MH863226  | EU552107 |
| <i>Capronia mansonii</i>                      | CBS 101.67 (T) | AF050247  | AY004338 |
| <i>Chaetothyriales</i> sp.                    | ES37           | MN218810  | -        |
| <i>Chaetothyriales</i> sp.                    | CBS 128948     | KX822492  | -        |
| <i>Chaetothyriales</i> sp.                    | T171           | KF614875  | KF614875 |
| <i>Chaetothyriales</i> sp.                    | L204           | FJ265765  | -        |
| <i>Chaetothyriales</i> sp.                    | L474           | FJ265772  | -        |
| <i>Chaetothyriales</i> sp.                    | S1             | FJ265763  | -        |
| <i>Chaetothyriales</i> sp.                    | SH10           | FJ265764  | -        |
| <i>Chaetothyriales</i> sp.                    | h12            | FJ265769  | -        |
| <i>Chaetothyriales</i> sp.                    | Sh25           | FJ265771  | -        |
| <i>Chaetothyriales</i> sp.                    | Sh36           | FJ265767  | -        |
| <i>Chaetothyriales</i> sp.                    | Sh9            | FJ265770  | -        |
| <i>Chaetothyriales</i> sp.                    | 01001a         | EU139137  | -        |
| <i>Chaetothyriales</i> sp.                    | 01001b         | EU139138  | -        |
| <i>Chaetothyriales</i> sp.                    | 04001a         | EU139139  | -        |
| <i>Chaetothyriales</i> sp.                    | h2             | FJ265766  | -        |
| <i>Chaetothyriales</i> sp.                    | 131b           | KM056296  | -        |
| <i>Chaetothyriales</i> sp.                    | 97001a         | EU139141  | -        |
| <i>Cladophialophora</i> sp.                   | A1044          | -         | KT263082 |
| <i>Cladophialophora</i> sp.                   | A1069          | -         | MF071385 |
| <i>Cladophialophora</i> aff. <i>parmeliae</i> | KoLRI_053928   | MZ855385  | -        |
| <i>Cladophialophora arxii</i>                 | CBS306.94      | EU103986  | KX822320 |
| <i>Cladophialophora australiensis</i>         | CBS 112793     | EU137331  | -        |
| <i>Cladophialophora bantiana</i>              | PWQ2419        | KP131826  | -        |
| <i>Cladophialophora boppii</i>                | CBS 126.86 (T) | MH861932  | NG058762 |
| <i>Cladophialophora bromeliacearum</i>        | FCCUFG 04      | MW794273  | MW794275 |
| <i>Cladophialophora carrionii</i>             | CBS_160.54     | KF928453  | LC192080 |
| <i>Cladophialophora chaetospira</i>           | CBS 115468     | EU137333  | MH878422 |
| <i>Cladophialophora chaetospira</i>           | CBS:127573     | MH864582  | -        |
| <i>Cladophialophora devriesii</i>             | CBS 147.84 (T) | EU103985  | KC809989 |
| <i>Cladophialophora emmonsii</i>              | CBS979         | EU103996  | KC809995 |

|                                        |                |                 |           |
|----------------------------------------|----------------|-----------------|-----------|
| <i>Cladophialophora exuberans</i>      | CMRP1204       | KY680432        | NG_060431 |
| <i>Cladophialophora exuberans</i>      | CMRP1227       | KY680429        | KY570931  |
| <i>Cladophialophora hostae</i>         | F-caf-cas341   | MT852361        | -         |
| <i>Cladophialophora hostae</i>         | CBS 121637     | KX822478        | ON543170  |
| <i>Cladophialophora humicola</i>       | CBS 117536 (T) | EU035408        | NG058850  |
| <i>Cladophialophora immunda</i>        | CBS 834.96     | EU137318        | MH874242  |
| <i>Cladophialophora immunda</i>        | CBS 109797     | FJ385271        | MH875350  |
| <i>Cladophialophora kellermaniana</i>  | ATCC 28332     | <b>AF393680</b> | -         |
| <i>Cladophialophora lanosa</i>         | KNU 16032 (T)  | LC387460        | LC387461  |
| <i>Cladophialophora matsushimae</i>    | MFC1-P384 (T)  | FN549916        | FN400758  |
| <i>Cladophialophora minourae</i>       | CBS 556.83 (T) | AY251087        | NG058763  |
| <i>Cladophialophora minutissima</i>    | isolate 0043   | MG597448        | NG_058851 |
| <i>Cladophialophora minutissima</i>    | UAMH 10709     | EF016381        | KJ636047  |
| <i>Cladophialophora modesta</i>        | CBS 985.96     | GU225939        | NG_058764 |
| <i>Cladophialophora mycetomatis</i>    | CBS 122637 (T) | FJ385276        | NG058960  |
| <i>Cladophialophora nyingchiensis</i>  | CGMCC3.17330   | MG012699        | MG197824  |
| <i>Cladophialophora nyingchiensis</i>  | CGMCC3.17514   | MG012701        | MG197826  |
| <i>Cladophialophora parmeliae</i>      | CBS 129337     | JQ342180        | JQ342182  |
| <i>Cladophialophora potulentorum</i>   | CBS 114772     | EU035410        | EU035410  |
| <i>Cladophialophora potulentorum</i>   | SREF159        | MN660432        | -         |
| <i>Cladophialophora proteae</i>        | CBS 111667 (T) | EU035411        | EU035411  |
| <i>Cladophialophora psammophila</i>    | CBS 110553     | AY857517        | -         |
| <i>Cladophialophora psammophila</i>    | CBS 110553 (T) | AY857517        | NG058955  |
| <i>Cladophialophora samoensis</i>      | CBS 259.83 (T) | MH861581        | NG058854  |
| <i>Cladophialophora saturnica</i>      | CBS109628      | EU103983        | KC809993  |
| <i>Cladophialophora saturnica</i>      | CBS118724      | EU103984        | -         |
| <i>Cladophialophora scillae</i>        | CBS 116461     | EU137329        | -         |
| <i>Cladophialophora</i> sp.            | 131            | KM056295        | -         |
| <i>Cladophialophora</i> sp.            | Sh20           | FJ265753        | -         |
| <i>Cladophialophora</i> sp.            | A670B          | KP889119        | -         |
| <i>Cladophialophora</i> sp.            | L359           | FJ265750        | -         |
| <i>Cladophialophora</i> sp.            | S5             | FJ265746        | -         |
| <i>Cladophialophora</i> sp.            | S5             | FJ265746        | -         |
| <i>Cladophialophora</i> sp.            | Sh20           | FJ265753        | -         |
| <i>Cladophialophora</i> sp.            | Sh8            | FJ265747        | -         |
| <i>Cladophialophora</i> sp.            | SYPF 8340      | -               | MF588879  |
| <i>Cladophialophora subtilis</i>       | CBS 122642 (T) | FJ385273        | NG058961  |
| <i>Cladophialophora sylvestris</i>     | CBS 350.83     | EU137330        | MH873324  |
| <i>Cladophialophora tengchongensis</i> | CGMCC3.15201   | MG012702        | MG197827  |
| <i>Cladophialophora tumbae</i>         | JCM 28746 (T)  | LC192125        | LC192090  |
| <i>Cladophialophora yegresii</i>       | CBS 114405 (T) | EU137322        | NG058855  |
| <i>Cyphellophora eucalypti</i>         | CBS 124764 (T) | KC455238        | GQ303305  |
| <i>Cyphellophora laciniata</i>         | CBS 190.61 (T) | EU035416        | KF928547  |
| <i>Cyphellophora olivacea</i>          | CBS 122.74 (T) | KC455247        | KC455260  |
| <i>Cyphellophora pluriseptata</i>      | CBS 286.85 (T) | MH861881        | KC455255  |
| <i>Cyphellophora sessilis</i>          | CBS 243.85 (T) | AY857542        | EU514700  |
| <i>Exophiala alcalophila</i>           | CBS 520.82 (T) | MH861524        | NG059189  |
| <i>Exophiala bonariae</i>              | CCFEE 5792 (T) | JX681046        | KR781083  |
| <i>Exophiala castellanii</i>           | CBS 158.58 (T) | MH857734        | KF928522  |
| <i>Exophiala dermatitidis</i>          | CBS 207.35 (T) | MH855649        | NG059225  |
| <i>Exophiala eucalypticola</i>         | CBS 143412 (T) | MH107891        | NG_063955 |



|                                          |                    |           |           |
|------------------------------------------|--------------------|-----------|-----------|
| <i>Exophiala italica</i>                 | MFLUCC 16-0245     | KY496744  | KY496723  |
| <i>Exophiala mesophila</i>               | CBS 402.95         | MH862536  | KX712349  |
| <i>Exophiala nigra</i>                   | CBS 535.94 (T)     | KY115191  | NG059253  |
| <i>Exophiala pisciphila</i>              | CBS 537.73 (T)     | DQ826739  | MH872483  |
| <i>Exophiala polymorpha</i>              | CBS 138920 (T)     | KP070763  | NG059237  |
| <i>Exophiala salmonis</i>                | CBS 157.67 (T)     | JF747137  | AY213702  |
| <i>Exophiala</i> sp.                     | SYPF 8334          | MF588877  | MF588894  |
| <i>Exophiala spinifera</i>               | D22I               | MH010942  | MH012097  |
| <i>Fonsecaea minima</i>                  | CBS 125757 (T)     | MH863743  | KF928520  |
| <i>Fonsecaea pedrosoi</i>                | CBS 271.37 (T)     | AB114127  | -         |
| <i>Herpotrichiellaceae</i> sp.           | MUT 5408           | KR014371  | KP671741  |
| <i>Melanoctona tectonae</i>              | MFLUCC 12-0389 (T) | KX258778  | KX258779  |
| <i>Minimelanolocus asiaticus</i>         | MFLUCC 15-0237 (T) | NR_154179 | KR215610  |
| <i>Minimelanolocus rousselianus</i>      | CBS 126086         | MH863784  | MH875246  |
| <i>Paracladophialophora cyperacearum</i> | CPC 33046 (T)      | NR_160625 | MH327844  |
| <i>Paracladophialophora carceris</i>     | CPC 27596 (T)      | NR_154360 | KY173488  |
| <i>Phaeoannellomyces elegans</i>         | CBS 101597         | NR_155687 | KY115194  |
| <i>Phialophora attae</i>                 | CBS 132767         | KF928464  | KF928528  |
| <i>Phialophora verrucosa</i>             | CBS 286.47         | KF928455  | KF928519  |
| <i>Rhinocladiella anceps</i>             | CBS 181.65         | AY163559  | MH870171  |
| <i>Rhinocladiella anceps</i>             | CBS 157.54         | EU041804  | MH868811  |
| <i>Rhinocladiella aquaspersa</i>         | CBS 122635         | GU017732  | KX822357  |
| <i>Rhinocladiella aquaspersa</i>         | CBS 313.73         | GU017733  | MH872396  |
| <i>Rhinocladiella aquaspersa</i>         | FMR 7699           | GU053606  | MH876010  |
| <i>Rhinocladiella atrovirens</i>         | CBS 264.49 (T)     | MH856518  | EU041869  |
| <i>Rhinocladiella atrovirens</i>         | C78LM-UFPR         | JN650538  | MH872441  |
| <i>Rhinocladiella atrovirens</i>         | CBS 264.49         | EU041812  | MH868048  |
| <i>Rhinocladiella atrovirens</i>         | CBS:317.33         | MH855447  | MH866906  |
| <i>Rhinocladiella atrovirens</i>         | UM 234             | JX966555  | -         |
| <i>Rhinocladiella basitona</i>           | CBS 101460         | EU041806  | NG_057783 |
| <i>Rhinocladiella basitona</i>           | CMCC(F)D.37c       | JX981676  | EU041863  |
| <i>Rhinocladiella coryli</i>             | CPC 26654          | KX306768  | KX306793  |
| <i>Rhinocladiella fasciculata</i>        | CBS 132.86 (T)     | NR_145356 | NG_057784 |
| <i>Rhinocladiella fasciculata</i>        | CBS 132.86         | EU041807  | MH873622  |
| <i>Rhinocladiella mackenziei</i>         | CBS:125089         | GQ863214  | EU041865  |
| <i>Rhinocladiella mackenziei</i>         | CNRMA7.1487        | KP132553  | EU041867  |
| <i>Rhinocladiella phaeophora</i>         | CBS 496.78         | MH861169  | MH872933  |
| <i>Rhinocladiella pyriformis</i>         | CBS:469.94         | MH862476  | -         |
| <i>Rhinocladiella quercus</i>            | CPC 26621 (T)      | KX306769  | NG059698  |
| <i>Rhinocladiella similis</i>            | CBS 111763         | EF551461  | KU752195  |
| <i>Rhinocladiella similis</i>            | FMR 3986           | KU705841  | KU705858  |
| <i>Rhinocladiella similis</i>            | PW3041             | LC158611  | LC158635  |
| <i>Rhinocladiella</i> sp.                | isolate GI-486     | OM307810  | -         |
| <i>Rhinocladiella</i> sp.                | L214               | FJ265762  | -         |
| <i>Rhinocladiella</i> sp.                | LA1                | HQ022436  | -         |
| <i>Rhinocladiella</i> sp.                | LA111              | HQ022438  | -         |
| <i>Rhinocladiella</i> sp.                | LA132              | HQ022437  | -         |
| <i>Rhinocladiella</i> sp.                | LA60               | HQ022440  | -         |
| <i>Rhinocladiella</i> sp.                | LA60               | JF682850  | -         |
| <i>Rhinocladiella</i> sp.                | LA99               | HQ022439  | -         |

|                                   |                                    |          |          |
|-----------------------------------|------------------------------------|----------|----------|
| <i>Rhinocladiella</i> sp.         | KJ502315                           | Igt-3    | -        |
| <i>Rhinocladiella</i> sp.         | R205                               | JX559853 | -        |
| <i>Rhinocladiella</i> sp.         | EXF-11381                          | MW031253 | -        |
| <i>Rhinocladiella</i> sp.         | GLMC 1752<br>KNUF-20-<br>NI005_ITS | MT156118 | MT156303 |
| <i>Rhinocladiella</i> sp.         | VL270                              | OP503368 | -        |
| <i>Rhinocladiella</i> sp.         | YH-2009a                           | JF440611 | -        |
| <i>Rhinocladiella</i> sp.         | 102                                | JX839531 | -        |
| <i>Rhinocladiella</i> sp.         | 16 PD-2-12                         | KM056298 | -        |
| <i>Rhinocladiella</i> sp.         | A8-21-5-2                          | JX839456 | -        |
| <i>Rhinocladiella</i> sp.         | A8-21-5-2                          | KX100400 | -        |
| <i>Rhinocladiella</i> sp.         | EXP0525F                           | DQ914689 | -        |
| <i>Rhinocladiella</i> sp.         | F74                                | GU067765 | -        |
| <i>Rhinocladiella</i> sp.         | FMR 12063                          | KU705840 | KU705857 |
| <i>Rhinocladiella</i> sp.         | HSAUP074099                        | FJ914711 | -        |
| <i>Rhinocladiella tropicalis</i>  | CMRP1287                           | KX434723 | KX583709 |
| <i>Rhinocladiella tropicalis</i>  | UFSM1                              | MH444804 | -        |
| <i>Thysanorea aquatica</i>        | MFLCC 15-0966                      | MG922572 | MG922576 |
| Uncultured <i>Chaetothyriales</i> | NMF-OTU-121                        | MG707593 | -        |
| Uncultured <i>Chaetothyriales</i> | FM034.2                            | JF691080 | -        |
| <i>Veronaea japonica</i>          | CBS 776.83 (T)                     | MH861692 | NG057789 |

**Table S4** List of taxa included in the phylogenetic analysis of *Dothideomycetes* and their NCBI accessions.

| Species                          | ID             | ITS       | LSU                  |
|----------------------------------|----------------|-----------|----------------------|
| <i>Abrothallus acetabuli</i>     | SPO308         | KF816165  | -                    |
| <i>Abrothallus parmeliarum</i>   | AB36           | KF816172  | KF816229             |
| <i>Abrothallus parmotrematis</i> | AB1            | KF816176  | -                    |
| <i>Abrothallus secedens</i>      | SPO305         | KF816169  | KF816231             |
| <i>Ampelomyces</i> sp.           | 3 NK-2011      | HQ846569  | -                    |
| <i>Arthonia didyma</i>           | O-L-197934     | -         | KJ851081<br>NG_05711 |
| <i>Atrocalyx bambusae</i>        | MFLU 11-0150   | NR_153559 | 6                    |
| <i>Atrocalyx bambusae</i>        | MFLUCC 10-0558 | KX672149  | KX672154<br>MW75037  |
| <i>Atrocalyx nordicus</i>        | CBS 147532     | NR_172997 | 4<br>NG_05871        |
| <i>Bhatiellae rosae</i>          | MFLU 16-0872   | NR_157505 | 8                    |
| <i>Bhatiellae rosae</i>          | MFLUCC 17-0664 | MG828873  | MG828989<br>NG_02757 |
| <i>Botryosphaeria dothidea</i>   | CBS 115476     | KF766151  | 7                    |
| <i>Bryochiton monascus</i>       | CBS 126284     | MH863957  | MH875416             |
| <i>Bryochiton monascus</i>       | M219           | KM186812  |                      |
| <i>Capnobotryella renispora</i>  | CBS 214.90     | NR_121295 | MH873888             |
| <i>Capnodiales</i> sp.           | A887           | -         | KT263454             |
| <i>Capnodiales</i> sp.           | A886           | -         | KT263453             |
| <i>Capnodiales</i> sp.           | UFMGCB8750     | KP903341  | -                    |
| <i>Capnodiales</i> sp.           | A959           | -         | KT263460             |
| <i>Capnodiales</i> sp.           | A577           | -         | KT263459             |
| <i>Capnodiales</i> sp.           | A545           | -         | KT263458             |
| <i>Capnodiales</i> sp.           | A571           | -         | KT263457             |
| <i>Capnodiales</i> sp.           | A923           | MF276907  | KT263456             |

|                                        |                 |           |          |
|----------------------------------------|-----------------|-----------|----------|
| <i>Capnodiales</i> sp.                 | A888            | -         | KT263455 |
| <i>Capnodiales</i> sp.                 | A960            | -         | KT263452 |
| <i>Capnodiales</i> sp.                 | A863            | -         | KT263451 |
| <i>Capnodiales</i> sp.                 | A913            | -         | KT263450 |
| <i>Capnodiales</i> sp.                 | A997            | -         | KT263449 |
| <i>Capnodiales</i> sp.                 | A951            | -         | KT263448 |
| <i>Capnodiales</i> sp.                 | A557            | -         | KT263447 |
| <i>Capnodiales</i> sp.                 | A1043           | -         | KT263446 |
| <i>Capnodiales</i> sp.                 | A995            | -         | KT263445 |
| <i>Capnodium coffeae</i>               | CBS 147.52      | MH856967  | MH868489 |
| <i>Catenulostroma</i> sp.              | UFMGCB8746      | KP903330  | -        |
| <i>Cladosporium cladosporioides</i>    | CBS 170.54      | MH857281  | MH868815 |
| <i>Columnosphaeria fagi</i>            | CBS 171.93      | KT693737  | -        |
| <i>Comoclathris lini</i>               | GR1-3-20-1      | LC514952  | LC514952 |
| <i>Comoclathris lini</i>               | G3-20-1         | -         | LC514924 |
| <i>Coniosporium</i> sp.                | MP45            | HM136653  | -        |
| <i>Coniosporium apollinis</i>          | CBS 100218      | -         | GU250898 |
| <i>Coniosporium</i> sp.                | MCF2            | KX688207  | MF334941 |
| <i>Coniothyrium ferrarisianum</i>      | CBS 285.74      | MH860854  | MH872593 |
| <i>Constantinomyces oldenburgensis</i> | T2.4            | LT976554  | LT976554 |
| <i>Constantinomyces oldenburgensis</i> | T2.3            | LT976553  | LT976553 |
| <i>Constantinomyces oldenburgensis</i> | CBS 144642      | NR_159758 | -        |
|                                        |                 |           | NG_04265 |
| <i>Cryomyces antarcticus</i>           | ATCC MYA-4880   | NR_111726 | 9        |
| <i>Cryomyces minteri</i>               | CBS 116302      | DQ028270  | -        |
|                                        |                 |           | NG_05884 |
| <i>Cryomyces minteri</i>               |                 |           | 7        |
|                                        | CCFEE 5187      | -         |          |
| <i>Cryomyces montanus</i>              | CCFEE 5476      | KC315849  | GU250394 |
| <i>Curreya grandicipis</i>             | CPC 1852        | JN712456  | JN712520 |
| <i>Delphinella strobiligena</i>        | CBS 735.71      | MH860318  | MH872074 |
| <i>Dendrographa leucophaea</i>         | S-F205891       | KF036008  | -        |
| <i>Dendrographa leucophaea</i>         | Tehler 7500     | AF066944  | -        |
| <i>Dendrographa minor</i>              | AFTOL-ID 355    | DQ842015  | AF279382 |
| <i>Devriesia strelitziae</i>           | CBS 122379      | EU436763  | MH874737 |
|                                        |                 |           | NG_06943 |
|                                        |                 |           | 9        |
| <i>Didymella aquatica</i>              | CGMCC 3.18349   | KY742055  | -        |
| <i>Didymella glomerata</i>             | LW5             | MN075513  | -        |
|                                        |                 |           | NG_06944 |
| <i>Didymella macrophylla</i>           | CGMCC 3.18357   | KY742070  | 1        |
|                                        |                 |           | NG_06782 |
|                                        |                 |           | 7        |
| <i>Didymocyrtis brachylaenae</i>       | C10             | OL891610  | -        |
| <i>Didymocyrtis brachylaenae</i>       | CPC:32651       | MH327821  | MH327857 |
| <i>Didymocyrtis cladoniicola</i>       | Ertz 16464 (BR) | KT383810  | -        |
| <i>Didymocyrtis cladoniicola</i>       | Ertz 16296 (BR) | KT383809  | -        |
| <i>Dothidea insculpta</i>              | CBS 189.58      | AF027764  | MH869284 |
| <i>Dothideales</i> sp.                 | CBS 122539      | FJ415475  | -        |
| <i>Dothideales</i> sp. A1132           | A1132           | -         | MF071373 |
| <i>Dothideomycetes</i>                 | LTSP_EUKA_P5M16 | FJ554180  | -        |
| <i>Dothideomycetes</i>                 | s_C03_05.ab1    | GU931724  | -        |
| <i>Dothideomycetes</i> sp.             | CGMMCC 3.17077  | KF513515  | -        |
| <i>Dothideomycetes</i> sp.             | A931            | MF276909  | KT263434 |
| <i>Dothideomycetes</i> sp.             | A595            | -         | KT263436 |
| <i>Dothideomycetes</i> sp.             | A583            | -         | KT263437 |
| <i>Dothideomycetes</i> sp.             | TRN 279         | -         | GU323983 |
| <i>Dothideomycetes</i> sp.             | CGMCC 3.17075   | -         | KF680785 |
| <i>Dothideomycetes</i> sp.             | CGMCC 3.17077   | -         | KF680783 |
| <i>Dothideomycetes</i> sp.             | PIMO_446        | JF705950  | -        |
| <i>Dothideomycetes</i> sp.             | AK1125          | JQ759473  | JQ759473 |
| <i>Dothideomycetes</i> sp.             | PIMO_109        | JF749175  | -        |
| <i>Dothideomycetes</i> sp.             | A552            | MF276909  | KT263435 |

|                                      |              |          |                      |
|--------------------------------------|--------------|----------|----------------------|
| <i>Dothideomycetes</i> sp.           | TRN 245      | -        | GU323980             |
| <i>Dothideomycetes</i> sp.           | A1057        | -        | KT263439             |
| <i>Dothideomycetes</i> sp.           | A567         | -        | KT263438             |
| <i>Dothideomycetes</i> sp.           | A977         | -        | KT263433             |
| <i>Dothideomycetes</i> sp.           | A552         | -        | KT263435             |
| <i>Dothideomycetes</i> sp.           | TRN 142      | -        | GU323975             |
| <i>Dothideomycetes</i> sp.           | TRN 138      | -        | GU323974             |
| <i>Dothideomycetes</i> sp.           | TRN 137      | -        | GU323973             |
| <i>Dothideomycetes</i> sp.           | TRN 123      | -        | GU323970             |
| <i>Dothideomycetes</i> sp.           | TRN 42       | -        | GU323958             |
| <i>Dothideomycetes</i> sp.           | TRN 11       | -        | GU323957             |
| <i>Dothideomycetes</i> sp.           | TRN 437      | -        | GU323984             |
| <i>Dothideomycetes</i> sp.           | A565         | -        | KT263440             |
| <i>Dothiorella gregaria</i>          | BJ17         | MN685280 | -                    |
| <i>Elasticomyces elasticus</i>       | CCFEE 5538   | KF309957 | KF310000             |
| <i>Elasticomyces elasticus</i>       | CCFEE 5537   | KF309956 | KF310001             |
| <i>Elasticomyces elasticus</i>       | CCFEE 5543   | KF309958 | KF309993             |
| <i>Elasticomyces elasticus</i>       | CBS 122538   | MH863220 | MH874750             |
| <i>Elasticomyces elasticus</i>       | CCFEE 5320   | -        | GU250376             |
| <i>Elasticomyces elasticus</i>       | CCFEE 5319   | -        | GU250375             |
| <i>Elsinoe phaseoli</i>              | CBS 165.31   | MH855166 | KX887026<br>NG_05919 |
| <i>Elsinoe veneta</i>                | CBS 164.29   | KX887297 | 4<br>NG_05920        |
| <i>Extremus antarcticus</i>          | CCFEE 451    | KF309978 | 4                    |
| <i>Friedmanniomyces endolithicus</i> | CCFEE 5001   | JN885543 | -                    |
| <i>Friedmanniomyces endolithicus</i> | CCFEE 524    | JN885541 | GU250364             |
| <i>Friedmanniomyces endolithicus</i> | CCFEE 670    | JN885542 | GU250366             |
| <i>Friedmanniomyces endolithicus</i> | CCFEE 5199   | JN885547 | -                    |
| Fungal sp.                           | agrD244      | JN053109 | -                    |
| Fungal sp.                           | agrD231      | JN053103 | -                    |
| Fungal sp.                           | PIMO_21      | HQ535864 | -                    |
| Fungal sp.                           | agrD242      | JN053107 | -                    |
| Fungal sp. TRN268                    | TRN268       | AY843113 | -                    |
| Fungal sp. TRN529                    | TRN529       | AY843200 | -                    |
| <i>Holmiella sabina</i>              | voucher G.M. | -        | MK546612             |
| <i>Jeremyomyces labinae</i>          | CBS:144617   | MK442589 | MK442529             |
| <i>Lecanactis abietina</i>           | Myllys (S)   | AF138822 | -                    |
| <i>Leptosphaeria</i>                 | plC11E       | HM136635 | -                    |
| <i>Leptosphaeria maculans</i>        | AFTOL-ID 277 | KT225526 | DQ470946             |
| <i>Leptosphaeria ogilviensis</i>     | CBS 233.58   | -        | MH869298             |
| <i>Leptospora rubella</i>            | CBS 592.76   | -        | MH872781             |
| <i>Lichenocodium erodens</i>         | CBS 128704   | MH864965 | MH876415             |
| <i>Lichenocodium usneae</i>          | CBS 129239   | MH865193 | MH876629             |
| <i>Lichenocodium usneae</i>          | CBS 128708   | MH864967 | MH876417             |
| <i>Lichenostigmatales</i> sp.        | A930         | -        | KT263424             |
| <i>Lichenothelia arida</i>           | L2217        | -        | MH259001             |
| <i>Lichenothelia calcarea</i>        | L1324        | -        | KC015062             |
| <i>Lichenothelia muriformis</i>      | L2308        | -        | MH259023             |
| <i>Lichenothelia papilliformis</i>   | L2319        | -        | MH259032             |
| <i>Lichenothelia</i> sp.             | L2343        | -        | MH259039             |
| <i>Lichenothelia</i> sp.             | L2334        | -        | MH259036             |
| <i>Lichenothelia</i> sp.             | L2333        | -        | MH259035             |
| <i>Lophiostoma cynaroidis</i>        | CBS:123025   | EU552138 | EU552138             |
| <i>Lophium mytilinum</i>             | CBS 114111   | EF596819 | EF596819             |
| <i>Melanomma sanguinarium strain</i> | CBS 125576   | MH863713 | -<br>NG_05944        |
| <i>Meristemomyces frigidus</i>       | CCFEE 5508   | -        | 4                    |
| <i>Monticola elongata</i>            | CBS 136206   | MH866090 | MH877617             |
| <i>Mycosphaerella punctiformis</i>   | CBS 113265   | AY490763 | AY490776             |

|                                       |       |               |           |           |
|---------------------------------------|-------|---------------|-----------|-----------|
| <i>Mycosphaerella</i> sp.             |       | Sh27          | FJ265760  | -         |
| <i>Mycosphaerella</i> sp.             |       | L357          | FJ265759  | -         |
| <i>Mycosphaerellaceae</i> sp.         |       | L1778         | -         | KC015079  |
| <i>Mycosphaerellaceae</i> sp.         |       | L1777         | -         | KC015078  |
| <i>Myriangiales</i> sp.               |       | A569          | -         | KT263443  |
| <i>Myriangiales</i> sp.               |       | A578          | -         | KT263442  |
| <i>Myriangiales</i> sp.               |       | A554          | -         | KT263441  |
| <i>Myriangiium duriaei</i>            |       | CBS 260.36    | MH855793  | -         |
| <i>Mytilinidion resinicola</i>        |       | CBS 304.34    | MH855535  | MH867038  |
| <i>Neocatenulostroma abietis</i>      |       | AFTOL-ID 2210 | -         | FJ267700  |
| <i>Neocatenulostroma abietis</i>      |       | CBS 459.93    | MH862431  | MH874081  |
| <i>Neocatenulostroma microsporium</i> |       | CBS 110890    | -         | EU019255  |
| <i>Neosetophoma salicis</i>           |       | MFLU 17-0118  | MK608025  | MK608026  |
| <i>Paradendryphiella arenariae</i>    |       | CBS 181.58    | NR_145170 | MH869281  |
| <i>Paraphaeosphaeria michotii</i>     |       | FeF168        | MZ492971  | -         |
| <i>Paraphaeosphaeria michotii</i>     |       | ICMP 11777    | MZ098686  | -         |
| <i>Paraphaeosphaeria michotii</i>     |       | 2015-F-275    | KU751878  | -         |
| <i>Penidiella ellipsoidea</i>         |       | CBS 128773    | NR_137773 | MH876539  |
| <i>Periconia</i> sp.                  |       | MBD_3641      | MK595571  | -         |
| <i>Phaeosphaeria</i>                  |       | SW_0_F12      | JF449769  | JF449769  |
| <i>Phaeosphaeria</i> sp.              |       | 1715242       | MW165855  | -         |
| <i>Phaeosphaeria</i> sp.              |       | AC            | KR909136  | -         |
| <i>Phaeosphaeriaceae</i> sp.          |       | MUT 4404      | KC339239  | KF636781  |
| <i>Phaeosphaeriopsis sansevieriae</i> |       | CBS:146984    | MZ064438  | MZ064495  |
| <i>Phoma caloplacae</i>               |       | CBS 129338    | JQ238641  | JQ238643  |
| <i>Phoma caloplacae</i>               |       | CBS 129140    | JQ238635  | MH876627  |
| <i>Phoma cladoniicola</i>             |       | CBS 128025    | JQ238623  | MH877975  |
| <i>Phoma cladoniicola</i>             |       | CBS 128023    | JQ238620  | JQ238622  |
| <i>Phoma cladoniicola</i>             |       | CBS 128026    | JQ238626  | JQ238628  |
| <i>Phoma cladoniicola</i>             |       | CBS 128027    | JQ238629  | MH877976  |
| <i>Phoma cladoniicola</i>             |       | FL14          | JQ318026  | JQ318028  |
| <i>Phoma cladoniicola</i>             |       | FL13          | JQ318023  | JQ318025  |
| <i>Phoma cladoniicola</i>             |       | FL5           | JQ318014  | JQ318016. |
| <i>Phoma herbarum</i>                 |       | p16           | MN795752  |           |
| <i>Phoma</i> sp.                      |       | A1134         | -         | MF071374  |
| <i>Phoma</i> sp.                      |       | A1130         | -         | MF071372  |
| <i>Phoma</i> sp.                      |       | A1086         | -         | MF071370  |
| <i>Phoma</i> sp.                      |       | A1077         | -         | MF071369  |
| <i>Phoma</i> sp.                      |       | A1074         | -         | MF071368  |
| <i>Phoma</i> sp.                      |       | A593          | -         | KT263432  |
| <i>Phoma</i> sp.                      |       | A542          | -         | KT263431  |
| <i>Phoma</i> sp.                      |       | A558          | -         | KT263430  |
| <i>Phoma</i> sp.                      |       | A53           | -         | KT263429  |
| <i>Pleospora ambigua</i>              |       | CBS 366.52    | -         | AY787937  |
| <i>Pleospora herbarum</i>             |       | AFTOL-ID      | DQ491516  | DQ678049  |
| <i>Pleospora leptosphaerulinoidea</i> |       | CBS 452.84    | MH861757  | MH873456  |
| <i>Pleosporales</i> sp.               |       | 19 KB-2015    | KR909182  | -         |
| <i>Pleosporales</i> sp.               | A1193 | -             | MF071376  |           |
| <i>Pleosporales</i> sp.               |       | A1038         | -         | KT263428  |
| <i>Pleosporales</i> sp.               |       | A1028         | -         | KT263427  |
| <i>Pleosporales</i> sp.               |       | A1011         | -         | KT263426  |
| <i>Pleosporales</i> sp. A1039         |       | A1039         | -         | KT263425  |
| <i>Preussia terricola</i>             |       | CBS 317.65    | MH858589  | MH870227  |
| <i>Rachicladosporium antarcticum</i>  |       | CCFEE 5527    | NR_144970 | KF309990  |
| <i>Rachicladosporium eucalypti</i>    |       | CBS:138900    | KP004448  | MH878629  |
| <i>Racodium rupestre</i>              |       | L424          | GU067669  | EU048582. |
| <i>Ramularia endophylla</i>           |       | CBS 124831    | MH863520  | MH875006  |
| <i>Ramularia vizellae</i>             |       | CBS:117882    | KP894300  | -         |
| <i>Ramularia vizellae</i>             |       | CBS:117883    | KP894301  | KP894194  |
| <i>Ramularia vizellae</i>             |       | CPC:25736     | KP894319  | KP894213  |

|                                    |                     |           |          |
|------------------------------------|---------------------|-----------|----------|
| <i>Ramularia vizellae</i>          | CPC:15541           | KP894310  | KP894204 |
| <i>Recurvomyces mirabilis</i>      | CCFEE 5475          | KF309962  | KC315876 |
| <i>Roccella phycopsis</i>          | 8295 (S)            | AJ634033  | EF081424 |
| <i>Roccella phycopsis</i>          | 8148 (S)            | AJ634027  | -        |
| <i>Saxomyces americanus</i>        | L2310               | -         | MH259025 |
| <i>Saxomyces americanus</i>        | L2306               | -         | MH259021 |
| <i>Saxomyces penninicus</i>        | L2304               | -         | MH259019 |
| <i>Saxomyces</i> sp.               | L2338               | -         | MH259038 |
| <i>Saxomyces</i> sp.               | L2336               | -         | MH259037 |
| <i>Saxomyces</i> sp.               | LM-2018a            | -         | MH259003 |
| <i>Saxomyces</i> sp. 'alpinus'     | CCFEE 5466          | -         | GU250392 |
| <i>Sclerostagonospora cycadis</i>  | CBS 123538          | MH863303  | MH874827 |
| <i>Spissiomycetes</i> sp.          | SDBR-CMU319         | MF990800  | -        |
| <i>Teichospora trabicola</i>       | CBS 140730          | NR_154635 | -        |
| <i>Teichospora trabicola</i>       | C141                | KU601592  | KU601592 |
| <i>Teratosphaeria encephalarti</i> | CBS 123540          | FJ372395  | MH874829 |
| <i>Teratosphaeria parva</i>        | CBS 114761          | EU707874  | KF902087 |
| <i>Teratosphaeria parva</i>        | AMR251              | AY509782  | -        |
| <i>Teratosphaeria parva</i>        | CPC 12419           | EU707879  | GQ852709 |
| <i>Teratosphaeriaceae</i> sp.      | CPC 12419           | KM216368  | -        |
| <i>Teratosphaeriaceae</i> sp.      | CBS 117932          | -         | GU323219 |
| <i>Teratosphaeriaceae</i> sp.      | A559                | -         | KT263444 |
| Uncultured <i>Ascomycota</i>       | PLC12C              | HM136678  | -        |
| Uncultured fungus                  | M129                | KF742583  | -        |
| Uncultured fungus                  | L042885-122-065-F09 | GU054203  | -        |
| Uncultured fungus                  | 112_NA4_P31_N4      | KC966093  | KC966093 |
| Uncultured fungus                  | B3_1986             | KU581691  | -        |
| Uncultured fungus                  | 127_NA4_P32_L9      | KC966349  | -        |
| Uncultured fungus                  | OTU569              | MF971528  | -        |
| Uncultured fungus                  | CMH210              | KF800301  | -        |
| Uncultured fungus                  | S241                | FJ820729  | -        |
| Uncultured fungus                  | clone G2_CC10       | JX043171  | -        |
| Uncultured fungus clone            | 99_NA9_P31_O2       | KC965832  | -        |
| Uncultured soil fungus             | FunN4_01B           | -         | EU861595 |
| Uncultured soil fungus             | FunN5_06G           | -         | EU861706 |
| <i>Venturia albae</i>              | CBS:471.61          | MK810955  | -        |
| <i>Venturia caesia</i>             | CBS:466.61          | MK810959  | EU035453 |
| <i>Vermiconia flagrans</i>         | CCFEE 5922          | KP791753  | KR781040 |
| <i>Westerdykella cylindrica</i>    | AFTOL-ID 1037       | DQ491519  | -        |

**Table S5** List of taxa included in the phylogenetic analysis of *Sordariomycetes* and their NCBI accessions.

| Species                        | ID                    | ITS       | LSU      |
|--------------------------------|-----------------------|-----------|----------|
| <i>Acremonium acutatum</i>     | CBS:682.71            | -         | MH872055 |
| <i>Acremonium sordidulum</i>   | CBS:385.73            | -         | MH872418 |
| <i>Ambrosiella xylebori</i>    | AFTOL 1285            | -         | DQ470979 |
| <i>Ambrosiella xylebori</i>    | JH12075               | MK118929  | -        |
| <i>Amplistroma caroliniana</i> | DOI                   | -         | FJ532376 |
| <i>Amplistroma einaceum</i>    | AH43902               | NR_145379 | KC907374 |
| <i>Amplistroma longicollis</i> | AH37870               | -         | HQ901790 |
| <i>Apiospora montagnei</i>     | AFTOL 951             | -         | DQ471018 |
| <i>Bertia moriformis</i>       | SMH4320               | -         | AY695260 |
| <i>Bertia moriformis</i>       | K(M):250951           | MZ159726  | -        |
| <i>Bertia tropicalis</i>       | SMH1707               | -         | AY695262 |
| <i>Bionectria ochroleuca</i>   | CCFC226708/ AFTOL 187 | KC460538  | AY283558 |
| <i>Bionectriaceae</i> sp.      | UFMGCB 12389          | MK889358  | -        |

|                                        |                              |          |           |
|----------------------------------------|------------------------------|----------|-----------|
| <i>Broomella rosae</i>                 | MFLU 16-0244                 | -        | MG828990  |
| <i>Camarops microspora</i>             |                              | -        | AY083821  |
| <i>Camarops petersii</i>               | LE 323478                    | MN564897 | AY346265  |
| <i>Camarops tubulina</i>               | ZT-Myc-64201                 | MW489535 | AY346266  |
| <i>Camarops ustulinoides</i>           | AFTOL 72                     | -        | DQ470941  |
| <i>Ceratosphaeria lampadophora</i>     |                              | -        | AY346270  |
| <i>Cercophora caudata</i>              | CBS 606.72                   | AY999135 | AY999113  |
| <i>Cercophora newfieldiana</i>         | SMH3303                      | -        | AY780062  |
| <i>Cercophora septentrionalis</i>      |                              | -        | U47823    |
| <i>Cercophora terricola</i>            | ATCC 200395                  | -        | AY780067  |
| <i>Ceriosporopsis halima</i>           |                              | EU557365 | U47844    |
| <i>Clavicipitaceae</i> sp.             | DIS 226a                     | -        | DQ674831  |
| <i>Coniochaeta acaciae</i>             | FeC152                       | MW447039 | -         |
| <i>Coniochaeta acaciae</i>             | MFLUCC 18-0776               | MT498810 | MT501618  |
| <i>Coniochaeta cipronana</i>           | MYA1205                      | LC431571 | -         |
| <i>Coniochaeta marina</i>              | MFLUCC:18-0408               | MK458764 | MK458765  |
| <i>Coniochaeta ostrea</i>              | AFTOL915                     | MH859821 | -         |
| <i>Coniochaeta</i> sp.                 | 1 TKPB-2017                  | MZ493049 | -         |
| <i>Coniochaeta</i> sp.                 | GSH1_4_8                     | KF128810 | -         |
| <i>Coniochaeta</i> sp.                 | Y111C                        | MW791935 | MW791935  |
| <i>Coniochaeta taeniospora</i>         | LTA                          | KU762324 | KU762324  |
| <i>Coniochaetales</i> sp.              | A1007                        | -        | KT263310  |
| <i>Coniochaetales</i> sp.              | A518                         | -        | KT263315  |
| <i>Coniochaetidium savoryi</i>         |                              | -        | AY346276  |
| <i>Cordyceps cardinalis</i>            | OSC93620                     | -        | AY184965  |
| <i>Cordyceps cardinalis</i>            | OSC93619                     | -        | AY184964  |
| <i>Cosmospora aurantiicola</i>         | F-251,308                    | EU860062 | EU860062  |
| <i>Cryptodiaporthe aesculi</i>         | AFTOL 1238                   | -        | DQ836905  |
| <i>Cryptodiaporthe aesculi</i>         | CBS 109765                   | DQ323530 | -         |
| <i>Cryptosphaeria pullmanensis</i>     | DTWIN100                     | -        | KT425282  |
| <i>Cryptosphaeria pullmanensis</i>     | SUPCON4                      | -        | KT425288  |
| <i>Cryptosphaeria pullmanensis</i>     | CFCC89942                    | KM588265 | -         |
| <i>Cryptosphaeria pullmanensis</i>     | CFCC89936                    | KM588259 | -         |
| <i>Diaporthe phaseolorum</i>           |                              | HM347707 | AY346279  |
| <i>Diatrype disciformis</i>            | AFTOL 927                    | -        | DQ470964  |
| <i>Elaphocordyceps ophioglossoides</i> | CBS 100.239                  | -        | KJ878874  |
| <i>Elaphocordyceps</i> sp.             | INBio_4515H                  | -        | KM242364  |
| <i>Elaphocordyceps</i> sp.             | JDF-2013g                    | KF753860 | -         |
| <i>Eutypa lata</i>                     | AFTOL 929                    | -        | DQ836903  |
| Fungal sp.                             | L003-02                      | KR004828 | -         |
| Fungal sp.                             | NLEndoHerit_007_2008N6-09-2I | JX978236 | -         |
| <i>Fusarium</i> sp.                    | F-267,620                    | EU860076 | EU860076  |
| <i>Fusarium</i> sp.                    | F-267,619                    | EU860075 | EU860075  |
| <i>Graphostroma platystoma</i>         | AFTOL 1249                   | -        | DQ836906  |
| <i>Graphostroma platystoma</i>         |                              | -        | AY083827  |
| <i>Halosphaeria appendiculata</i>      |                              | -        | U46885    |
| <i>Heterotruncatella</i> sp.           | STE-U 9128                   | MT316313 | -         |
| <i>Hyaloscypha hepaticola</i>          | M171                         | JN943612 | EU940118  |
| <i>Hyalotiella spartii</i>             | MFLUCC 13-0397               | -        | NG_059561 |
| <i>Hyalotiella transvalensis</i>       | CBS:300.66                   | -        | MH870439  |
| <i>Hypocrea citrina</i>                |                              | -        | EU481408  |
| <i>Hypocreales</i> sp.                 | A560                         | -        | KT263318  |
| <i>Immersiella immersa</i>             | SMH2589                      | -        | AY436408  |
| <i>Lasiosphaeria ovina</i>             | SMH3923/ M176                | -        | AY587950  |
| <i>Lasiosphaeria sorbina</i>           | GJSL555                      | -        | AY436415  |
| <i>Lasiosphaeriella nitida</i>         | SMH1290                      | -        | HM171283  |
| <i>Lasiosphaeriella pseudobombarda</i> | SMH4365                      | -        | HM171285  |
| <i>Leotia lubrica</i>                  | OTA:61895                    | JX178635 | AY789359  |
| <i>Leptospora gregaria</i>             |                              | -        | AY346290  |

|                                  |               |          |           |
|----------------------------------|---------------|----------|-----------|
| <i>Leptospora gregaria</i>       | SMH4867       | -        | HM171288  |
| <i>Leucostoma niveum</i>         | AR3512        | -        | AF408367  |
| <i>Linocarpon clavatum</i>       | HKUM1924      | -        | DQ810201  |
| <i>Linocarpon appendiculatum</i> | HKUCC2986     | -        | DQ810199  |
| <i>Linocarpon carinisporum</i>   | HKUM7710      | -        | DQ810200  |
| <i>Linocarpon elaeidis</i>       | 5458          | -        | DQ810222  |
| <i>Linocarpon livistonae</i>     | HKUCC2954     | -        | DQ810206  |
| <i>Linocarpon livistonae</i>     | HKUM6520      | -        | DQ810205  |
| <i>Magnaporthe grisea</i>        | AR3390        | -        | AF362554  |
| <i>Melanconis alni</i>           | D156          | MN784966 | -         |
| <i>Melanconis carthusiana</i>    | AR3581        | -        | EU255135  |
| <i>Melanconis marginalis</i>     |               | -        | AF277144  |
| <i>Melanconis marginalis</i>     | MAFF 410218   | JX522742 | -         |
| <i>Melanconis stilbostoma</i>    | DMW 514.3     | MN784990 | -         |
| <i>Melanconis stilbostoma</i>    | AR3501        | -        | AF408374  |
| <i>Melanconis stilbostoma</i>    | E01051        | -        | AY577813  |
| <i>Melanospora zamiae</i>        | ATCC 96173    | -        | AY057906  |
| <i>Melanospora zamiae</i>        | CBS 628.71    | KY628680 | -         |
| <i>Microascus giganteus</i>      |               | -        | AF275540  |
| <i>Microascus trigonosporus</i>  | AFTOL 914     | DQ491513 | DQ470958  |
| <i>Microcera cf. rubra</i>       | KoLRI_053251  | MZ855423 | -         |
| <i>Microcera larvarum</i>        | ICMP 5444     | MT107902 | -         |
| <i>Microcera physciae</i>        | CPC 41038     | OK664728 | OK663767  |
| <i>Microcera rubra</i>           | CBS:638.76    | -        | MH872790  |
| <i>Nectria cinnabarina</i>       |               | -        | AF193237  |
| <i>Nectria cinnabarina</i>       | CBS 255.47    | HM484710 | -         |
| <i>Nimbospora effusa</i>         |               | -        | U46892    |
| <i>Ophioceras dolichostomum</i>  | CBS 114.926   | JX134677 | JX134689  |
| <i>Ophioceras sp.</i>            | CMU 26633     | -        | EU571272  |
| <i>Oxydothis fondicola</i>       |               | -        | AY083835  |
| <i>Pestalotiopsis sp.</i>        | AM257-P5T2T-2 | KT264533 | -         |
| <i>Petriella setifera</i>        | AFTOL 956     | -        | DQ470969  |
| <i>Petriella setifera</i>        | CBS 559.80    | AY882356 | -         |
| <i>Phacidium lacerum</i>         | Mz-F38        | KU942438 | DQ470976  |
| <i>Podospora fibrinocaudata</i>  | TRTC 48343    | -        | AY780074  |
| <i>Podospora fibrinocaudata</i>  | CBS:315.91    | MH862255 | -         |
| <i>Poroconiochaeta discoidea</i> |               | -        | AY346297  |
| <i>Poroconiochaeta discoidea</i> | CBS 158.80    | MH861253 | -         |
| <i>Sordariomycetes sp.</i>       | TS1_1_5i      | KY742564 | -         |
| <i>Sordariomycetes sp.</i>       | n165.1        | MF135148 | -         |
| <i>Sordariomycetes sp.</i>       | A13           | KX611007 | -         |
| <i>Stachybotrys chartarum</i>    | CBS 363.49    | KU846681 | AY554249  |
| <i>Strattonia carbonaria</i>     |               | -        | AY346302  |
| <i>Thielavia sp.</i>             | KoLRI_053268  | MZ855452 | -         |
| <i>Tolypocladium pustulatum</i>  | MF5368LR      | -        | AF373282  |
| <i>Tolypocladium sp.</i>         | M1-1-5U       | MN096582 | -         |
| <i>Tolypocladium sp.</i>         | MS217         | LC482111 | -         |
| <i>Tolypocladium sp.</i>         | GLMC 1695     | -        | MT156313  |
| <i>Truncatella angustata</i>     | S358          | -        | OL604502  |
| Uncultured fungus                | 67_NA3_P31_O8 | KC965446 | KC965446  |
| <i>Valsa ambiens</i>             | AFTOL 2131    | -        | AF277146  |
| <i>Valsa ambiens</i>             | CBS:109491    | MH862828 | -         |
| <i>Varicosporina ramulosa</i>    |               | -        | U44092    |
| <i>Varicosporina ramulosa</i>    | CBS:398.65    | MH858634 | -         |
| <i>Wallrothiella congregata</i>  | SMH1760       | -        | FJ532375  |
| <i>Wallrothiella congregata</i>  | ANM81         | -        | FJ532374  |
| <i>Xylaria acuta</i>             | AFTOL 63      | DQ491493 | AY544676  |
| <i>Xylaria hypoxylon</i>         | AFTOL 51      | DQ491487 | AY544648  |
| <i>Xylaria hypoxylon</i>         | 303           | -        | NG_027599 |
| <i>Xylariales sp.</i>            | A588          | -        | KT263313  |



|                       |       |   |          |
|-----------------------|-------|---|----------|
| <i>Xylariales</i> sp. | A592  | - | KT263312 |
| <i>Xylariales</i> sp. | A1014 | - | KT263311 |

---
